# Supplementary material for: The Impact of Prior Breast Augmentation on Breast Reconstruction after Mastectomy
Source: PubMed Central journal article supplement — Plast Reconstr Surg Glob Open. 2023 May 22;11(5):e5025. doi: 10.1097/GOX.0000000000005025 (PMC10287142; doi:10.1097/gox.0000000000005025), 2023-05-22
Supplement: gox-11-e5025-s001.pdf [file gox-11-e5025-s001.pdf]

**SDC 1. Oncologic treatment**

|                             | Previously<br>augmented<br>(Group A)<br>(n=20) | Reconstructed<br>non-augmented<br>(Group B)<br>(n=222) | Non-reconstructed<br>and non-augmented<br>(Group C)<br>(n=228) | <i>p</i> -value |
|-----------------------------|------------------------------------------------|--------------------------------------------------------|----------------------------------------------------------------|-----------------|
| Neoadjuvant treatment*      |                                                |                                                        |                                                                |                 |
| Yes                         | 5 (25.0%)                                      | 40 (18.0%)                                             | 48 (21.1%)                                                     | 0.60            |
| Adjuvant chemotherapy*      |                                                |                                                        |                                                                |                 |
| Yes                         | 7 (35.0%)                                      | 101 (45.5%)                                            | 106 (46.5%)                                                    | 0.61            |
| Adjuvant hormone therapy*   |                                                |                                                        |                                                                |                 |
| Yes                         | 14 (70.0%)                                     | 162 (73.0%)                                            | 172 (75.4%)                                                    | 0.77            |
| Adjuvant radiation therapy* |                                                |                                                        |                                                                |                 |
| Yes                         | 5 (25.0%)                                      | 50 (22.5%)                                             | 69 (30.3%)                                                     | 0.18            |
| Time to surgery (days)**    | 75.7 (70.6)                                    | 76.2 (117.9)                                           | 60.6 (74.3)                                                    | 0.23            |
| Type of surgery*            |                                                |                                                        |                                                                |                 |
| Bilateral TM                | 10 (50.0%)                                     | 140 (63.1%)                                            | 89 (39.0%)                                                     |                 |
| Bilateral MRM               | 0 (0.0%)                                       | 0 (0.0%)                                               | 2 (0.9%)                                                       |                 |
| Bilateral NSM               | 1 (5.0%)                                       | 20 (9%)                                                | 1 (0.4%)                                                       |                 |
| Unilateral NSM              | 1 (5.0%)                                       | 3 (1.4%)                                               | 0 (0.0%)                                                       |                 |
| Unilateral TM               | 4 (20.0%)                                      | 37 (16.7%)                                             | 78 (34.2%)                                                     |                 |
| Unilateral MRM              | 2 (10.0%)                                      | 6 (2.7%)                                               | 34 (14.9%)                                                     |                 |
| Unilateral RM               | 1 (5.0%)                                       | 1 (0.5%)                                               | 0 (0.0%)                                                       |                 |

|                                   |             |             |             |                  |
|-----------------------------------|-------------|-------------|-------------|------------------|
| MRM with<br>contralateral TM      | 1 (5.0%)    | 15 (6.8%)   | 22 (9.6%)   | <b>&lt;0.001</b> |
| Disease status at last follow-up* |             |             |             |                  |
| No evidence of<br>disease         | 20 (100.0%) | 219 (98.6%) | 212 (93.0%) |                  |
| Ongoing treatment                 | 0 (0.0%)    | 0 (0.0%)    | 5 (2.2%)    |                  |
| Recurrence                        | 0 (0.0%)    | 3 (1.4%)    | 11 (4.8%)   | <b>0.03</b>      |

---

**Notes.** TM= Total mastectomy; MRM= Modified radical mastectomy; NSM= Nipple-sparing mastectomy; RM= Radical mastectomy.

\* Denotes outcomes reported as total number (percentage).

\*\* Denotes outcomes reported as average (standard deviation).

**Bold** indicates  $p < 0.05$ , statistically significant.
